# Supplementary material for: PI3K-driven HER2 expression is a potential therapeutic target in colorectal cancer stem cells
Source: HighWire-hosted journal article supplement (doi:10.1136/gutjnl-2020-323553), 2021-01-12
Supplement: gutjnl-2020-323553supp009_data_supplement.pdf [file gutjnl-2020-323553supp009_data_supplement.pdf]

Supplementary Table 4: RPPA antibody validation.

| Validation Status*                                                                                                                                                                              |                                      | *RPPA Set 131-Present*      |              |                   |             |                |         |                    |               |         |
|-------------------------------------------------------------------------------------------------------------------------------------------------------------------------------------------------|--------------------------------------|-----------------------------|--------------|-------------------|-------------|----------------|---------|--------------------|---------------|---------|
| Valid = RPPA and WB correlation > 0.7                                                                                                                                                           |                                      |                             |              |                   |             |                |         |                    |               |         |
| Use with Caution = RPPA and WB correlation < 0.7                                                                                                                                                |                                      |                             |              |                   |             |                |         |                    |               |         |
| Under Evaluation = Antibody has given mixed results and/or evaluated by another lab; We are in the process of (re)validating                                                                    |                                      |                             |              |                   |             |                |         |                    |               |         |
| Used for QC = These antibodies are used for tissue sample quality control (QC); WILL NOT report to Datasets containing tissue samples, but WILL report to Datasets containing cell line samples |                                      |                             |              |                   |             |                |         |                    |               |         |
| #                                                                                                                                                                                               | Official Ab Name                     | Ab Name Reported on Dataset | Gene Name    | Company           | Catalog #   | Internal Ab ID | Species | Validation Status* | RPPA Dilution | Storage |
| 1                                                                                                                                                                                               | 14-3-3 beta                          | 14-3-3-beta                 | YWHA         | Santa Cruz        | sc-628      | 882            | Rabbit  | Valid              | 1:75          | 4       |
| 2                                                                                                                                                                                               | 14-3-3 epsilon                       | 14-3-3-epsilon              | YWHA         | Santa Cruz        | sc-23957    | 913            | Mouse   | Use with Caution   | 1:50          | 4       |
| 3                                                                                                                                                                                               | 14-3-3 zeta                          | 14-3-3-zeta                 | YWHA         | Santa Cruz        | sc-1019     | 883            | Rabbit  | Valid              | 1:5000        | 4       |
| 4                                                                                                                                                                                               | 4E-BP1                               | 4E-BP1                      | EIF4EBP1     | CST               | 9452        | 2              | Rabbit  | Valid              | 1:100         | -20     |
| 5                                                                                                                                                                                               | 4E-BP1 (phospho S65)                 | 4E-BP1_pS65                 | EIF4EBP1     | CST               | 9456        | 3              | Rabbit  | Valid              | 1:250         | -20     |
| 6                                                                                                                                                                                               | 53BP1                                | 53BP1                       | TP53BP1      | CST               | 4937        | 985            | Rabbit  | Valid              | 1:300         | -20     |
| 7                                                                                                                                                                                               | Acetyl CoA Carboxylase (phospho S79) | ACC_pS79                    | ACACA, ACACB | CST               | 3661        | 13             | Rabbit  | Valid              | 1:500         | -20     |
| 8                                                                                                                                                                                               | Acetyl CoA Carboxylase 1             | ACC1                        | ACACA        | Abcam             | ab45174     | 14             | Rabbit  | Use with Caution   | 1:2000        | -20     |
| 9                                                                                                                                                                                               | ADAR1                                | ADAR1                       | ADAR         | Abcam             | ab88574     | 1198           | Mouse   | Valid              | 1:200         | -20     |
| 10                                                                                                                                                                                              | Akt                                  | Akt                         | AKT1,2,3     | CST               | 4691        | 1084           | Rabbit  | Valid              | 1:10000       | -20     |
| 11                                                                                                                                                                                              | Akt (phospho S473)                   | Akt_pS473                   | AKT1,2,3     | CST               | 9271        | 230            | Rabbit  | Valid              | 1:150         | -20     |
| 12                                                                                                                                                                                              | Akt (phospho T308)                   | Akt_pT308                   | AKT1,2,3     | CST               | 2965        | 1154           | Rabbit  | Valid              | 1:500         | -20     |
| 13                                                                                                                                                                                              | AMPK alpha                           | AMPKa                       | PRKAA1       | CST               | 2532        | 39             | Rabbit  | Use with Caution   | 1:200         | -20     |
| 14                                                                                                                                                                                              | AMPK alpha (phospho T172)            | AMPKa_pT172                 | PRKAA1       | CST               | 2535        | 40             | Rabbit  | Use with Caution   | 1:100         | -20     |
| 15                                                                                                                                                                                              | AMPK alpha 2 (Phospho S345)          | AMPK-a2_pS345               | PRKAA2       | Abcam             | ab129081    | 1351           | Rabbit  | Valid              | 1:500         | -20     |
| 16                                                                                                                                                                                              | Androgen Receptor                    | AR                          | AR           | Abcam             | ab52615     | 756            | Rabbit  | Valid              | 1:100         | -20     |
| 17                                                                                                                                                                                              | Annexin I                            | Annexin-I                   | ANXA1        | BD Biosciences    | 610066      | 1208           | Mouse   | Valid              | 1:5000        | -20     |
| 18                                                                                                                                                                                              | Annexin VII                          | Annexin-VII                 | ANXA7        | BD Biosciences    | 610668      | 1142           | Mouse   | Valid              | 1:30          | -20     |
| 19                                                                                                                                                                                              | A-Raf                                | A-Raf                       | ARAF         | CST               | 4432        | 1217           | Rabbit  | Valid              | 1:150         | -20     |
| 20                                                                                                                                                                                              | ARID1A                               | ARID1A                      | ARID1A       | Sigma-Aldrich     | HPA005456   | 1442           | Rabbit  | Use with Caution   | 1:1000        | -20     |
| 21                                                                                                                                                                                              | Atg3                                 | Atg3                        | ATG3         | CST               | 3415        | 1612           | Rabbit  | Valid              | 1:750         | -20     |
| 22                                                                                                                                                                                              | Atg7                                 | Atg7                        | ATG7         | CST               | 8558        | 1613           | Rabbit  | Valid              | 1:1000        | -20     |
| 23                                                                                                                                                                                              | ATM                                  | ATM                         | ATM          | CST               | 2873        | 1363           | Rabbit  | Valid              | 1:250         | -20     |
| 24                                                                                                                                                                                              | ATM (phospho S1981)                  | ATM_pS1981                  | ATM          | CST               | 5883        | 1364           | Rabbit  | Valid              | 1:25          | -20     |
| 25                                                                                                                                                                                              | ATR (Phospho S428)                   | ATR_pS428                   | ATR          | Abcam             | ab178407    | 1795           | Rabbit  | Use with Caution   | 1:1000        | -20     |
| 26                                                                                                                                                                                              | ATRX                                 | ATRX                        | ATRX         | Abcam             | ab97508     | 1569           | Rabbit  | Use with Caution   | 1:1000        | -20     |
| 27                                                                                                                                                                                              | Aurora B/AIM1                        | Aurora-B                    | AIM1         | CST               | 3094        | 1404           | Rabbit  | Valid              | 1:50          | -20     |
| 28                                                                                                                                                                                              | Axl                                  | Axl                         | AXL          | CST               | 8661        | 1271           | Rabbit  | Valid              | 1:1000        | -20     |
| 29                                                                                                                                                                                              | B7-H4                                | B7-H4                       | VTCN1        | CST               | 14572       | 1726           | Rabbit  | Use with Caution   | 1:50          | -20     |
| 30                                                                                                                                                                                              | Bad (phospho S112)                   | Bad_pS112                   | BAD          | CST               | 9291        | 63             | Rabbit  | Valid              | 1:50          | -20     |
| 31                                                                                                                                                                                              | Bak                                  | Bak                         | BAK1         | Abcam             | ab32371     | 71             | Rabbit  | Use with Caution   | 1:30          | -20     |
| 32                                                                                                                                                                                              | BAP1                                 | BAP1                        | BAP1         | Santa Cruz        | sc-28383    | 1207           | Mouse   | Valid              | 1:125         | 4       |
| 33                                                                                                                                                                                              | Bax                                  | Bax                         | BAX          | CST               | 2772        | 73             | Rabbit  | Valid              | 1:100         | -20     |
| 34                                                                                                                                                                                              | Bcl2                                 | Bcl2                        | BCL2         | Dako              | M0887       | 80             | Mouse   | Valid              | 1:50          | 4       |
| 35                                                                                                                                                                                              | Bcl2A1                               | Bcl2A1                      | BCL2A1       | Abnova            | PAB8528     | 1299           | Rabbit  | Valid              | 1:250         | -20     |
| 36                                                                                                                                                                                              | Bcl-xL                               | Bcl-xL                      | BCL2L1       | CST               | 2762        | 85             | Rabbit  | Valid              | 1:100         | -20     |
| 37                                                                                                                                                                                              | Beclin                               | Beclin                      | BECN1        | Santa Cruz        | sc-10086    | 87             | Goat    | Use with Caution   | 1:250         | 4       |
| 38                                                                                                                                                                                              | beta Actin                           | b-Actin                     | ACTB         | CST               | 4970        | 1169           | Rabbit  | Use with Caution   | 1:75          | -20     |
| 39                                                                                                                                                                                              | beta Catenin                         | b-Catenin                   | CTNNB1       | CST               | 9562        | 75             | Rabbit  | Valid              | 1:1500        | -20     |
| 40                                                                                                                                                                                              | beta Catenin (phospho T41/S45)       | b-Catenin_pT41_S45          | CTNNB1       | CST               | 9565        | 1170           | Rabbit  | Valid              | 1:30          | -20     |
| 41                                                                                                                                                                                              | Bid                                  | Bid                         | BID          | Abcam             | ab32060     | 88             | Rabbit  | Use with Caution   | 1:30          | -20     |
| 42                                                                                                                                                                                              | Bim                                  | Bim                         | BCL2L11      | Abcam             | ab32158     | 90             | Rabbit  | Valid              | 1:400         | -20     |
| 43                                                                                                                                                                                              | BIP/GRP78                            | BIP-GRP78                   | HSPA5        | BD Biosciences    | 610978      | 1311           | Mouse   | Use with Caution   | 1:750         | -20     |
| 44                                                                                                                                                                                              | B-Raf                                | B-Raf                       | BRAF         | CST               | 14814       | 2083           | Rabbit  | Use with Caution   | 1:500         | -20     |
| 45                                                                                                                                                                                              | B-Raf (phospho S445)                 | B-Raf_pS445                 | BRAF         | CST               | 2696        | 94             | Rabbit  | Valid              | 1:1000        | -20     |
| 46                                                                                                                                                                                              | BRD4                                 | BRD4                        | BRD4         | CST               | 13440       | 1567           | Rabbit  | Valid              | 1:200         | -20     |
| 47                                                                                                                                                                                              | c-Abl                                | c-Abl                       | ABL          | CST               | 2862        | 1565           | Rabbit  | Valid              | 1:50          | -20     |
| 48                                                                                                                                                                                              | c-IAP2                               | c-IAP2                      | BIRC3        | CST               | 3130        | 1615           | Rabbit  | Use with Caution   | 1:750         | -20     |
| 49                                                                                                                                                                                              | Caspase-3 active                     | Caspase-3                   | CASP3        | Abcam             | ab32042     | 108            | Rabbit  | Use with Caution   | 1:250         | -20     |
| 50                                                                                                                                                                                              | Caspase-7 (cleaved D198)             | Caspase-7-cleaved           | CASP7        | CST               | 9491        | 109            | Rabbit  | Use with Caution   | 1:75          | -20     |
| 51                                                                                                                                                                                              | Caspase-8                            | Caspase-8                   | CASP8        | CST               | 9746        | 951            | Mouse   | **Used for QC**    | 1:150         | -20     |
| 52                                                                                                                                                                                              | Caveolin-1                           | Caveolin-1                  | CAV1         | CST               | 3238        | 114            | Rabbit  | Valid              | 1:5000        | -20     |
| 53                                                                                                                                                                                              | CD171 (L1)                           | CD171                       | L1CAM        | BioLegend         | 826701      | 1737           | Mouse   | Valid              | 1:1000        | 4       |
| 54                                                                                                                                                                                              | CD26                                 | CD26                        | CD26         | Abcam             | ab28340     | 1308           | Rabbit  | Valid              | 1:1000        | -20     |
| 55                                                                                                                                                                                              | CD29                                 | CD29                        | ITGB1        | BD Biosciences    | 610467      | 1206           | Mouse   | Valid              | 1:30          | -20     |
| 56                                                                                                                                                                                              | CD31                                 | CD31                        | PECAM1       | Dako              | M0823       | 127            | Mouse   | Valid              | 1:30          | 4       |
| 57                                                                                                                                                                                              | CD44                                 | CD44                        | CD44         | CST               | 3570        | 1398           | Mouse   | Use with Caution   | 1:50          | -20     |
| 58                                                                                                                                                                                              | CD49b                                | CD49b                       | ITGA2        | BD Biosciences    | 611016      | 937            | Mouse   | Valid              | 1:50          | -20     |
| 59                                                                                                                                                                                              | cdc2 (Phospho Y15)                   | cdc2_pY15                   | CDK1         | CST               | 4539        | 1783           | Rabbit  | Use with Caution   | 1:250         | -20     |
| 60                                                                                                                                                                                              | cdc25C                               | cdc25C                      | CDC25C       | CST               | 4688        | 1873           | Rabbit  | Valid              | 1:500         | -20     |
| 61                                                                                                                                                                                              | CDK1                                 | CDK1                        | CDK1         | Abcam             | ab32384     | 1658           | Rabbit  | Use with Caution   | 1:1000        | -20     |
| 62                                                                                                                                                                                              | CDKN2A/p16INK4a                      | p16INK4a                    | CDKN2A       | Abcam             | ab81278     | 1231           | Rabbit  | Valid              | 1:500         | -20     |
| 63                                                                                                                                                                                              | Chk1                                 | Chk1                        | CHEK1        | CST               | 2360        | 1203           | Mouse   | Use with Caution   | 1:250         | -20     |
| 64                                                                                                                                                                                              | Chk1 (phospho S296)                  | Chk1_pS296                  | CHEK1        | Abcam             | ab79758     | 1348           | Rabbit  | Valid              | 1:125         | -20     |
| 65                                                                                                                                                                                              | Chk2                                 | Chk2                        | CHEK2        | CST               | 3440        | 146            | Mouse   | Valid              | 1:50          | -20     |
| 66                                                                                                                                                                                              | Chk2 (phospho T68)                   | Chk2_pT68                   | CHEK2        | CST               | 2197        | 147            | Rabbit  | Use with Caution   | 1:125         | -20     |
| 67                                                                                                                                                                                              | c-Jun (phospho S73)                  | c-Jun_pS73                  | JUN          | CST               | 9164        | 155            | Rabbit  | Valid              | 1:30          | -20     |
| 68                                                                                                                                                                                              | c-Kit                                | c-Kit                       | KIT          | Abcam             | ab32363     | 157            | Rabbit  | Valid              | 1:30          | -20     |
| 69                                                                                                                                                                                              | Claudin 7                            | Claudin-7                   | CLDN7        | Novus Biologicals | NB100-91714 | 852            | Rabbit  | Valid              | 1:300         | -20     |
| 70                                                                                                                                                                                              | c-Met                                | c-Met                       | MET          | CST               | 3127        | 726            | Mouse   | **Used for QC**    | 1:250         | -20     |
| 71                                                                                                                                                                                              | c-Met (phospho Y1234/Y1235)          | c-Met_pY1234_Y1235          | MET          | CST               | 3129        | 727            | Rabbit  | Valid              | 1:100         | -20     |
| 72                                                                                                                                                                                              | c-Myc                                | c-Myc                       | MYC          | Santa Cruz        | sc-764      | 1143           | Rabbit  | Use with Caution   | 1:125         | 4       |
| 73                                                                                                                                                                                              | COG3                                 | COG3                        | COG3         | ProteinTech       | 11130-1-AP  | 1656           | Rabbit  | Valid              | 1:750         | -20     |
| 74                                                                                                                                                                                              | COL6A1                               | Collagen-VI                 | COL6A1       | Santa Cruz        | sc-20649    | 171            | Rabbit  | Valid              | 1:5000        | 4       |
| 75                                                                                                                                                                                              | Connexin 43                          | Connexin-43                 | CN3A2        | CST               | 3512        | 1568           | Rabbit  | Use with Caution   | 1:150         | -20     |
| 76                                                                                                                                                                                              | Cox2                                 | Cox2                        | PTGS2        | CST               | 4842        | 1218           | Rabbit  | Use with Caution   | 1:50          | -20     |
| 77                                                                                                                                                                                              | Cox-IV                               | Cox-IV                      | PTGS3        | CST               | 4850        | 1116           | Rabbit  | Valid              | 1:1000        | -20     |
| 78                                                                                                                                                                                              | C-Raf (phospho S338)                 | C-Raf_pS338                 | RAF1         | CST               | 9427        | 179            | Rabbit  | Valid              | 1:100         | -20     |

|     |                                        |                      |                  |                      |             |      |        |                                      |         |     |
|-----|----------------------------------------|----------------------|------------------|----------------------|-------------|------|--------|--------------------------------------|---------|-----|
| 79  | C-Raf/Raf-1                            | C-Raf                | RAF1             | Millipore            | 04-739      | 1201 | Rabbit | Use with Caution                     | 1:200   | -20 |
| 80  | CREB                                   | CREB                 | CREB1            | CST                  | 9197        | 181  | Rabbit | Use with Caution                     | 1:1000  | -20 |
| 81  | Cyclin B1                              | Cyclin-B1            | CCNB1            | Epitomics            | 1495-1      | 192  | Rabbit | Valid                                | 1:1500  | -20 |
| 82  | Cyclin D1                              | Cyclin-D1            | CCND1            | Santa Cruz           | sc-718      | 194  | Rabbit | Valid                                | 1:200   | 4   |
| 83  | Cyclin D3                              | Cyclin-D3            | CCND3            | CST                  | 2936        | 198  | Mouse  | Valid                                | 1:1000  | -20 |
| 84  | Cyclin E1                              | Cyclin-E1            | CCNE1            | Santa Cruz           | sc-247      | 201  | Mouse  | Valid                                | 1:30    | 4   |
| 85  | Cyclophilin F                          | Cyclophilin-F        | PP1F             | Abcam                | ab110324    | 1257 | Mouse  | Valid                                | 1:50000 | 4   |
| 86  | Detyrosinated alpha-Tubulin            | D- $\alpha$ -Tubulin | TUBA1A           | Abcam                | ab48389     | 1379 | Rabbit | Valid                                | 1:500   | -20 |
| 87  | Dimethyl-Histone H3 (Lys4)             | DM-Histone-H3        | HISTH3           | Millipore            | 07-030      | 1380 | Rabbit | Valid                                | 1:1500  | -20 |
| 88  | Dimethyl-K9 Histone H3                 | DM-K9-Histone-H3     | H3K9ME2          | Abcam                | ab32521     | 1397 | Rabbit | Use with Caution                     | 1:250   | -20 |
| 89  | DUSP4/MKP2                             | DUSP4                | DUSP4            | CST                  | 5149        | 1406 | Rabbit | Valid                                | 1:250   | -20 |
| 90  | E2F-1                                  | E2F1                 | E2F1             | Santa Cruz           | sc-251      | 1261 | Mouse  | Valid                                | 1:30    | 4   |
| 91  | E-Cadherin                             | E-Cadherin           | CDH1             | CST                  | 3195        | 1099 | Rabbit | Valid                                | 1:300   | -20 |
| 92  | eEF2                                   | eEF2                 | EEF2             | CST                  | 2332        | 1060 | Rabbit | Use with Caution                     | 1:50    | -20 |
| 93  | eEF2K                                  | eEF2K                | EEF2K            | CST                  | 3692        | 1061 | Rabbit | Valid                                | 1:50    | -20 |
| 94  | EGFR                                   | EGFR                 | EGFR             | CST                  | 2232        | 1120 | Rabbit | Valid                                | 1:100   | -20 |
| 95  | EGFR (phospho Y1173)                   | EGFR_pY1173          | EGFR             | Abcam                | ab32578     | 221  | Rabbit | Valid                                | 1:50    | -20 |
| 96  | eIF4E                                  | eIF4E                | EIF4E            | CST                  | 9742        | 722  | Rabbit | Valid                                | 1:75    | -20 |
| 97  | eIF4E (Phospho S209)                   | eIF4E_pS209          | EIF4E            | Abcam                | ab76256     | 1871 | Rabbit | Valid                                | 1:500   | -20 |
| 98  | eIF4G                                  | eIF4G                | EIF4G1           | CST                  | 2498        | 1124 | Rabbit | Use with Caution                     | 1:1000  | -20 |
| 99  | Elk1 (phospho S383)                    | Elk1_pS383           | ELK1             | CST                  | 9181        | 228  | Rabbit | Use with Caution                     | 1:50    | -20 |
| 100 | ENY2                                   | ENY2                 | ENY2             | GeneTex              | GTX629542   | 1219 | Mouse  | Use with Caution                     | 1:1000  | -20 |
| 101 | Epithelial Membrane Antigen            | EMA                  | EMA              | Dako                 | M061329-2   | 1350 | Mouse  | Use with Caution                     | 1:1000  | 4   |
| 102 | ErbB2/HER2                             | HER2                 | ERBB2            | Lab Vision           | MS-325-P1   | 1038 | Mouse  | Valid                                | 1:3000  | 4   |
| 103 | ErbB2/HER2 (phospho Y1248)             | HER2_pY1248          | ERBB2            | R&D Systems          | AF1768      | 1075 | Rabbit | Use with Caution (likely sees pEGFR) | 1:1500  | -20 |
| 104 | ErbB3/HER3                             | HER3                 | ERBB3            | Santa Cruz           | sc-285      | 911  | Rabbit | Valid                                | 1:300   | 4   |
| 105 | ErbB3/HER3 (phospho Y1289)             | HER3_pY1289          | ERBB3            | CST                  | 4791        | 728  | Rabbit | Use with Caution                     | 1:50    | -20 |
| 106 | ERCC1                                  | ERCC1                | ERCC1            | Santa Cruz           | sc-17809    | 1357 | Mouse  | Valid                                | 1:30    | 4   |
| 107 | ERCC5                                  | ERCC5                | ERCC5            | ProteinTech          | 11331-1-AP  | 1355 | Rabbit | Use with Caution                     | 1:250   | -20 |
| 108 | ERRF1/MIG6                             | MIG6                 | ERRF1            | Sigma-Aldrich        | WH0054206M1 | 1062 | Mouse  | Valid                                | 1:50    | -20 |
| 109 | Estrogen Receptor                      | ER                   | ESR1             | Lab Vision           | RM-9101     | 238  | Rabbit | Valid                                | 1:40    | 4   |
| 110 | Estrogen Receptor alpha (Phospho S118) | ER- $\alpha$ _pS118  | ESR1             | Abcam                | ab32396     | 241  | Rabbit | Valid                                | 1:1000  | -20 |
| 111 | Ets-1                                  | Ets-1                | ETS1             | Bethyl               | A303-501A   | 1200 | Rabbit | Valid                                | 1:100   | 4   |
| 112 | FAK                                    | FAK                  | PTK2             | Abcam                | ab40794     | 252  | Rabbit | Use with Caution                     | 1:1000  | -20 |
| 113 | FAK (phospho Y397)                     | FAK_pY397            | PTK2             | CST                  | 3283        | 1227 | Rabbit | Valid                                | 1:30    | -20 |
| 114 | Fatty Acid Synthase                    | FASN                 | FASN             | CST                  | 3180        | 1156 | Rabbit | Valid                                | 1:1000  | -20 |
| 115 | Fibronectin                            | Fibronectin          | FN1              | Epitomics            | 1574-1      | 262  | Rabbit | Valid                                | 1:10000 | -20 |
| 116 | FoxM1                                  | FoxM1                | FOXO1            | CST                  | 5436        | 1123 | Rabbit | Valid                                | 1:30    | -20 |
| 117 | FoxO3a                                 | FoxO3a               | FOXO3            | CST                  | 2497        | 1122 | Rabbit | Use with Caution                     | 1:25    | -20 |
| 118 | FoxO3a (phospho S318/S321)             | FoxO3a_pS318_S321    | FOXO3            | CST                  | 9465        | 270  | Rabbit | Use with Caution                     | 1:30    | -20 |
| 119 | FRA-1                                  | FRA-1                | FRA1             | Santa Cruz           | sc-605      | 1184 | Rabbit | Use with Caution                     | 1:100   | 4   |
| 120 | G6PD                                   | G6PD                 | G6PD             | CST                  | 8866        | 1779 | Rabbit | Valid                                | 1:1000  | -20 |
| 121 | Gab2                                   | Gab2                 | GAB2             | CST                  | 3239        | 943  | Rabbit | Valid                                | 1:300   | -20 |
| 122 | GAPDH                                  | GAPDH                | GAPDH            | Life Technologies    | AM4300      | 274  | Mouse  | Use with Caution                     | 1:50000 | -20 |
| 123 | GATA3                                  | GATA3                | GATA3            | BD Biosciences       | 558686      | 764  | Mouse  | Valid                                | 1:300   | 4   |
| 124 | GCLM                                   | GCLM                 | GCLM             | Abcam                | ab124827    | 1745 | Rabbit | Use with Caution                     | 1:500   | -20 |
| 125 | GCN5L2                                 | GCN5L2               | KAT2A            | CST                  | 3305        | 1263 | Rabbit | Valid                                | 1:30    | -20 |
| 126 | Glutamate Dehydrogenase1/2             | Glutamate-D1-2       | GLUD             | CST                  | 12793       | 1617 | Rabbit | Use with Caution                     | 1:500   | -20 |
| 127 | Glutaminase                            | Glutaminase          | GLS              | Abcam                | ab156876    | 1491 | Rabbit | Use with Caution                     | 1:250   | -20 |
| 128 | Glycogen Synthase                      | Gys                  | GYS1             | CST                  | 3886        | 1035 | Rabbit | Valid                                | 1:1500  | -20 |
| 129 | Glycogen Synthase (phospho S641)       | Gys_pS641            | GYS1             | CST                  | 3891        | 1036 | Rabbit | Valid                                | 1:250   | -20 |
| 130 | Granzyme B                             | Granzyme-B           | GZMB             | CST                  | 4275        | 1807 | Rabbit | Valid                                | 1:500   | -20 |
| 131 | GSK-3alpha/beta                        | GSK-3a-b             | GSK3A, GSK3B     | Santa Cruz           | sc-7291     | 284  | Mouse  | Valid                                | 1:750   | 4   |
| 132 | GSK-3alpha/beta (phospho S21/S9)       | GSK-3a-b_pS21_S9     | GSK3A, GSK3B     | CST                  | 9331        | 285  | Rabbit | Valid                                | 1:200   | -20 |
| 133 | H2AX (phospho S140)                    | H2AX_pS140           | H2AX             | Pierce Biotechnology | MA1-2022    | 1409 | Mouse  | Use with Caution                     | 1:400   | -20 |
| 134 | Heregulin                              | Heregulin            | NRG1             | CST                  | 2573        | 890  | Rabbit | Valid                                | 1:30    | -20 |
| 135 | HES1                                   | HES1                 | HES1             | CST                  | 11988       | 1582 | Rabbit | Valid                                | 1:1000  | -20 |
| 136 | Hexokinase II                          | Hexokinase-II        | HK2              | CST                  | 2867        | 1023 | Rabbit | Valid                                | 1:50    | -20 |
| 137 | Hif-1 alpha                            | Hif-1-alpha          | HIF1A            | BD Biosciences       | 610958      | 1402 | Mouse  | Use with Caution                     | 1:50    | -20 |
| 138 | Histone H3                             | Histone-H3           | H3F3A, H3F3B     | Abcam                | ab1791      | 1250 | Rabbit | Valid                                | 1:3000  | -20 |
| 139 | HSP27                                  | HSP27                | HSP27            | CST                  | 2402        | 321  | Mouse  | Use with Caution                     | 1:100   | -20 |
| 140 | HSP27 (phospho S82)                    | HSP27_pS82           | HSBP1            | CST                  | 2401        | 323  | Rabbit | Valid                                | 1:75    | -20 |
| 141 | HSP70                                  | HSP70                | HSP70            | CST                  | 4872        | 325  | Rabbit | Use with Caution                     | 1:150   | -20 |
| 142 | IGF1R (phospho Y1135/Y1136)            | IGF1R_pY1135_Y1136   | IGF1R            | CST                  | 3024        | 1221 | Rabbit | Valid                                | 1:30    | -20 |
| 143 | IGFBP2                                 | IGFBP2               | IGFBP2           | CST                  | 3922        | 335  | Rabbit | Valid                                | 1:50    | -20 |
| 144 | IGFRb                                  | IGFRb                | INSR             | CST                  | 3027        | 336  | Rabbit | Use with Caution                     | 1:250   | -20 |
| 145 | INPP4b                                 | INPP4b               | INPP4B           | CST                  | 4039        | 1065 | Rabbit | Valid                                | 1:25    | -20 |
| 146 | Insulin Receptor beta                  | IR-b                 | INSRB            | CST                  | 3025        | 1586 | Rabbit | Use with Caution                     | 1:750   | -20 |
| 147 | IRF-1                                  | IRF-1                | IRF1             | Santa Cruz           | sc-497      | 1316 | Rabbit | Use with Caution                     | 1:200   | 4   |
| 148 | IRS1                                   | IRS1                 | IRS1             | Millipore            | 06-248      | 802  | Rabbit | Valid                                | 1:400   | -20 |
| 149 | Jagged1                                | Jagged1              | JAG1             | Abcam                | ab109536    | 1413 | Rabbit | Valid                                | 1:750   | -20 |
| 150 | Jak2                                   | Jak2                 | JAK2             | CST                  | 3230        | 1166 | Rabbit | Valid                                | 1:750   | -20 |
| 151 | JNK/SAPK (phospho T183/Y185)           | JNK_pT183_Y185       | MAPK8            | CST                  | 4668        | 888  | Rabbit | Valid                                | 1:30    | -20 |
| 152 | JNK2                                   | JNK2                 | MAPK9            | CST                  | 4672        | 380  | Rabbit | Use with Caution                     | 1:30    | -20 |
| 153 | LC3A/B                                 | LC3A-B               | LC3AB            | CST                  | 4108        | 1618 | Rabbit | Use with Caution                     | 1:500   | -20 |
| 154 | Lck                                    | Lck                  | LCK              | CST                  | 2752        | 397  | Rabbit | Valid                                | 1:100   | -20 |
| 155 | LDHA                                   | LDHA                 | LDHA             | CST                  | 3582        | 976  | Rabbit | Use with Caution                     | 1:250   | -20 |
| 156 | LRP6 (phospho S1490)                   | LRP6_pS1490          | LRP6             | CST                  | 2568        | 1367 | Rabbit | Valid                                | 1:500   | -20 |
| 157 | MAPK (phospho T202/Y204)               | MAPK_pT202_Y204      | MAPK1, MAPK3     | CST                  | 4377        | 405  | Rabbit | Valid                                | 1:30    | -20 |
| 158 | Mcl 1                                  | Mcl-1                | MCL1             | CST                  | 5453        | 1222 | Rabbit | Valid                                | 1:100   | -20 |
| 159 | MDM2 (phospho S166)                    | MDM2_pS166           | MDM2             | CST                  | 3521        | 1164 | Rabbit | Valid                                | 1:50    | -20 |
| 160 | MEK1                                   | MEK1                 | MAP2K1           | Abcam                | ab32576     | 417  | Rabbit | Valid                                | 1:1500  | -20 |
| 161 | MEK1 (phospho S217/S221)               | MEK1_pS217_S221      | MAP2K1<br>MAP2K2 | CST                  | 9154        | 1076 | Rabbit | Valid                                | 1:50    | -20 |
| 162 | MERIT40 (Phospho S29)                  | MERIT40_pS29         | BABAM1           | CST                  | 12110       | 1952 | Rabbit | Valid                                | 1:1000  | -20 |
| 163 | Merlin/NF2                             | Merlin               | NF2              | Novus Biologicals    | 22710002    | 1046 | Rabbit | Use with Caution                     | 1:250   | -20 |
| 164 | MIF                                    | MIF                  | MIF              | Santa Cruz           | sc-20121    | 1323 | Rabbit | Use with Caution                     | 1:300   | 4   |
| 165 | MMP2                                   | MMP2                 | MMP2             | CST                  | 4022        | 435  | Rabbit | Valid                                | 1:75    | -20 |

|     |                                   |                   |                                              |                   |              |      |        |                  |         |     |
|-----|-----------------------------------|-------------------|----------------------------------------------|-------------------|--------------|------|--------|------------------|---------|-----|
| 166 | Mnk1                              | Mnk1              | MKNK1                                        | CST               | 2195         | 1005 | Rabbit | Valid            | 1:1000  | -20 |
| 167 | Monocarboxylic Acid Transporter 4 | MCT4              | SLC16A4                                      | Millipore         | AB3314P      | 1633 | Rabbit | Valid            | 1:500   | -20 |
| 168 | MSH6                              | MSH6              | MSH6                                         | Novus Biologicals | 22030002     | 1063 | Rabbit | Use with Caution | 1:1000  | -20 |
| 169 | MSI2                              | MSI2              | MSI2                                         | Abcam             | ab76148      | 1675 | Rabbit | Use with Caution | 1:4000  | -20 |
| 170 | mTOR                              | mTOR              | MTOR                                         | CST               | 2983         | 444  | Rabbit | Valid            | 1:1000  | -20 |
| 171 | mTOR (phospho S2448)              | mTOR_pS2448       | MTOR                                         | CST               | 2971         | 446  | Rabbit | Use with Caution | 1:50    | -20 |
| 172 | Myosin heavy chain 11             | Myosin-11         | MYH11                                        | Novus Biologicals | 21370002     | 1139 | Rabbit | Valid            | 1:5000  | -20 |
| 173 | Myosin Ila (phospho S1943)        | Myosin-lla_pS1943 | MYH9                                         | CST               | 5026         | 1160 | Rabbit | Valid            | 1:1000  | -20 |
| 174 | Myt1                              | Myt1              | MYT1                                         | CST               | 4282         | 1803 | Rabbit | Use with Caution | 1:2000  | -20 |
| 175 | NAPSIN A                          | NAPSIN-A          | NAPSA                                        | Abcam             | ab129189     | 1274 | Rabbit | Use with Caution | 1:150   | -20 |
| 176 | N-Cadherin                        | N-Cadherin        | CDH2                                         | CST               | 4061         | 452  | Rabbit | Valid            | 1:30    | -20 |
| 177 | NDRG1 (phospho T346)              | NDRG1_pT346       | NDRG1                                        | CST               | 3217         | 1126 | Rabbit | Valid            | 1:100   | -20 |
| 178 | NDUFB4                            | NDUFB4            | NDUFB4                                       | Abcam             | ab110243     | 1345 | Mouse  | Valid            | 1:30    | 4   |
| 179 | NF-kappaB p65 (phospho S536)      | NF-kB-p65_pS536   | RELA                                         | CST               | 3033         | 457  | Rabbit | Use with Caution | 1:30    | -20 |
| 180 | Notch1                            | Notch1            | NOTCH1                                       | CST               | 3268         | 1064 | Rabbit | Valid            | 1:30    | -20 |
| 181 | Notch3                            | Notch3            | NOTCH3                                       | Santa Cruz        | sc-5593      | 767  | Rabbit | Use with Caution | 1:300   | 4   |
| 182 | N-Ras                             | N-Ras             | NRAS                                         | Santa Cruz        | sc-31        | 1136 | Mouse  | Valid            | 1:50    | 4   |
| 183 | Oct-4                             | Oct-4             | OCT4                                         | CST               | 2750         | 1669 | Rabbit | Use with Caution | 1:200   | -20 |
| 184 | p21                               | p21               | CDKN1A                                       | Santa Cruz        | sc-397       | 470  | Rabbit | Valid            | 1:150   | 4   |
| 185 | p27 KIP 1                         | p27-Kip-1         | CDKN1B                                       | Abcam             | ab32034      | 897  | Rabbit | Valid            | 1:50    | -20 |
| 186 | p27/KIP 1 (phospho T198)          | p27_pT198         | CDKN1B                                       | Abcam             | ab64949      | 878  | Rabbit | Valid            | 1:30    | -20 |
| 187 | p38 MAPK                          | p38               | MAPK14                                       | CST               | 9212         | 478  | Rabbit | Valid            | 1:1500  | -20 |
| 188 | p38 MAPK (phospho T180/Y182)      | p38_pT180_Y182    | MAPK14                                       | CST               | 9211         | 479  | Rabbit | Valid            | 1:50    | -20 |
| 189 | p44/42 MAPK                       | p44-42-MAPK       | MAPK3                                        | CST               | 4695         | 1119 | Rabbit | Valid            | 1:2000  | -20 |
| 190 | p53                               | p53               | TP53                                         | CST               | 9282         | 481  | Rabbit | Use with Caution | 1:2500  | -20 |
| 191 | p70 S6 Kinase (phospho T389)      | p70-S6K_pT389     | RPS6KB1                                      | CST               | 9205         | 494  | Rabbit | Valid            | 1:50    | -20 |
| 192 | p70/S6K1                          | p70-S6K1          | RPS6KB1                                      | Abcam             | ab32529      | 493  | Rabbit | Valid            | 1:300   | -20 |
| 193 | p90RSK (phospho T573)             | p90RSK_pT573      | RPS6K                                        | CST               | 9346         | 1178 | Rabbit | Use with Caution | 1:30    | -20 |
| 194 | PAI-1                             | PAI-1             | SERPINE1                                     | BD Biosciences    | 612024       | 499  | Mouse  | Valid            | 1:100   | -20 |
| 195 | PAICS                             | PAICS             | PAICS                                        | Sigma-Aldrich     | HPA035895    | 1322 | Rabbit | Use with Caution | 1:250   | -20 |
| 196 | PAK1                              | PAK1              | PAK1                                         | CST               | 2602         | 1811 | Rabbit | Valid            | 1:1000  | -20 |
| 197 | PAK4                              | PAK4              | PAK4                                         | CST               | 3242         | 1389 | Rabbit | Valid            | 1:750   | -20 |
| 198 | PAR                               | PAR               | PAR                                          | Trevigen          | 4336-BPC-100 | 1370 | Rabbit | Use with Caution | 1:15000 | -20 |
| 199 | PARK7/DJ1                         | DJ1               | PARK7                                        | Abcam             | ab76008      | 891  | Rabbit | Valid            | 1:5000  | -20 |
| 200 | PARP                              | PARP              | PARP1                                        | CST               | 9532         | 2185 | Rabbit | Valid            | 1:1000  | -20 |
| 201 | Paxillin                          | Paxillin          | PXN                                          | Epitomics         | 1500-1       | 505  | Rabbit | Use with Caution | 1:500   | -20 |
| 202 | P-Cadherin                        | P-Cadherin        | CDH3                                         | CST               | 2130         | 509  | Rabbit | Use with Caution | 1:50    | -20 |
| 203 | PCNA                              | PCNA              | PCNA                                         | CST               | 2586         | 1383 | Mouse  | Use with Caution | 1:1000  | -20 |
| 204 | Pdc4                              | Pdc4              | PDCD4                                        | Rockland          | 600-401-965  | 816  | Rabbit | Use with Caution | 1:750   | -20 |
| 205 | PDGFR beta                        | PDGFR-b           | PDGFRB                                       | CST               | 3169         | 1225 | Rabbit | Valid            | 1:100   | -20 |
| 206 | PDHK1                             | PDHK1             | PDHK1                                        | CST               | 3820         | 1622 | Rabbit | Use with Caution | 1:500   | -20 |
| 207 | PDK1                              | PDK1              | PDPK1                                        | CST               | 3062         | 515  | Rabbit | Valid            | 1:50    | -20 |
| 208 | PDK1 (phospho S241)               | PDK1_pS241        | PDPK1                                        | CST               | 3061         | 516  | Rabbit | Valid            | 1:50    | -20 |
| 209 | PD-1                              | PD-1              | CD274                                        | CST               | 13684        | 1724 | Rabbit | Use with Caution | 1:150   | -20 |
| 210 | PEA-15                            | PEA-15            | PEA15                                        | CST               | 2780         | 1017 | Rabbit | Valid            | 1:100   | -20 |
| 211 | PED/PEA-15 (phospho S116)         | PEA-15_pS116      | PEA15                                        | Invitrogen        | 44-836G      | 1018 | Rabbit | Valid            | 1:1000  | -20 |
| 212 | PI3 Kinase p110 alpha             | PI3K-p110-a       | PIK3CA                                       | CST               | 4255         | 808  | Rabbit | Use with Caution | 1:75    | -20 |
| 213 | PI3K p110 beta                    | PI3K-p110-b       | PIK3CB                                       | Santa Cruz        | sc-376412    | 1330 | Mouse  | Use with Caution | 1:60    | 4   |
| 214 | PI3K p85                          | PI3K-p85          | PIK3R1                                       | Millipore         | 06-195       | 523  | Rabbit | Valid            | 1:15000 | -20 |
| 215 | PKA RI alpha                      | PKA-a             | PRKAR1A                                      | CST               | 5675         | 1667 | Rabbit | Valid            | 1:200   | -20 |
| 216 | PKCalpha                          | PKCa              | PRKCA                                        | CST               | 2056         | 1158 | Rabbit | Valid            | 1:200   | -20 |
| 217 | PKC beta II (phospho S660)        | PKC-b-II_pS660    | PRKCA, PRKCB<br>PRKCD, PRKCE<br>PRKCH, PRKCQ | CST               | 9371         | 1137 | Rabbit | Valid            | 1:200   | -20 |
| 218 | PKC delta (phospho S664)          | PKC-delta_pS664   | PRKCD                                        | Millipore         | 07-875       | 932  | Rabbit | Valid            | 1:100   | -20 |
| 219 | PKM2                              | PKM2              | PKM2                                         | CST               | 4053         | 1025 | Rabbit | Use with Caution | 1:300   | -20 |
| 220 | PLC gamma2 (phospho Y759)         | PLC-gamma2_pY759  | PLCG2                                        | CST               | 3874         | 1030 | Rabbit | Use with Caution | 1:30    | -20 |
| 221 | PLK1                              | PLK1              | PLK1                                         | CST               | 4513         | 754  | Rabbit | Use with Caution | 1:125   | -20 |
| 222 | PMS2                              | PMS2              | PMS2                                         | Novus Biologicals | 22510002     | 1246 | Rabbit | Valid            | 1:1500  | -20 |
| 223 | PRAS40                            | PRAS40            | AKT1S1                                       | Invitrogen        | AHO1031      | 738  | Mouse  | Use with Caution | 1:250   | -20 |
| 224 | PRAS40 (phospho T246)             | PRAS40_pT246      | AKT1S1                                       | Life Technologies | 441100G      | 739  | Rabbit | Valid            | 1:500   | -20 |
| 225 | PREX1                             | PREX1             | PREX1                                        | Abcam             | ab102739     | 1204 | Rabbit | Valid            | 1:150   | -20 |
| 226 | Progesterone Receptor             | PR                | PGR                                          | Abcam             | ab32085      | 549  | Rabbit | Valid            | 1:50    | -20 |
| 227 | PTEN                              | PTEN              | PTEN                                         | CST               | 9552         | 566  | Rabbit | Valid            | 1:500   | -20 |
| 228 | Rab11                             | Rab11             | RAB11A,B                                     | CST               | 3539         | 1083 | Rabbit | Under Evaluation | 1:30    | -20 |
| 229 | Rab25                             | Rab25             | RAB25                                        | CST               | 4314         | 1150 | Rabbit | Valid            | 1:30    | -20 |
| 230 | Rad50                             | Rad50             | RAD50                                        | Millipore         | 05-525       | 987  | Mouse  | Valid            | 1:100   | -20 |
| 231 | Rad51                             | Rad51             | RAD51                                        | CST               | 8875         | 1262 | Rabbit | Valid            | 1:30    | -20 |
| 232 | Raptor                            | Raptor            | RPTOR                                        | CST               | 2280         | 1128 | Rabbit | Valid            | 1:300   | -20 |
| 233 | Rb                                | Rb                | RB1                                          | CST               | 9309         | 552  | Mouse  | **Used for QC**  | 1:100   | -20 |
| 234 | Rb (phospho S807/S811)            | Rb_pS807_S811     | RB1                                          | CST               | 9308         | 557  | Rabbit | Valid            | 1:500   | -20 |
| 235 | RBM15                             | RBM15             | RBM15                                        | Novus Biologicals | 21390002     | 1138 | Rabbit | Valid            | 1:5000  | -20 |
| 236 | Rheb                              | Rheb              | RHEB                                         | R&D Systems       | MAB3426      | 847  | Mouse  | Use with Caution | 1:75    | -20 |
| 237 | Rictor                            | Rictor            | RICTOR                                       | CST               | 2114         | 1129 | Rabbit | Use with Caution | 1:100   | -20 |
| 238 | Rictor (phospho T1135)            | Rictor_pT1135     | RICTOR                                       | CST               | 3806         | 1130 | Rabbit | Valid            | 1:200   | -20 |
| 239 | RIP                               | RIP               | RIP                                          | CST               | 4926         | 1624 | Rabbit | Use with Caution | 1:250   | -20 |
| 240 | Rock-1                            | Rock-1            | ROCK1                                        | Santa Cruz        | sc-5560      | 1334 | Rabbit | Use with Caution | 1:1000  | 4   |
| 241 | RPA32                             | RPA32             | RPA32                                        | CST               | 2208         | 1368 | Rat    | Use with Caution | 1:500   | -20 |
| 242 | RPA32 (Phospho S4/S8)             | RPA32_pS4_S8      | RPA32                                        | Bethyl            | A300-245A    | 1375 | Rabbit | Use with Caution | 1:250   | 4   |
| 243 | RSK                               | RSK               | RPS6KA1<br>RPS6KA2<br>RPS6KA3                | CST               | 9347         | 759  | Rabbit | Use with Caution | 1:150   | -20 |
| 244 | S6 (phospho S235/S236)            | S6_pS235_S236     | RPS6                                         | CST               | 2211         | 600  | Rabbit | Valid            | 1:2500  | -20 |
| 245 | S6 (phospho S240/S244)            | S6_pS240_S244     | RPS6                                         | CST               | 2215         | 601  | Rabbit | Valid            | 1:1000  | -20 |
| 246 | S6 Ribosomal Protein              | S6                | RPS6                                         | CST               | 2317         | 1874 | Mouse  | Valid            | 1:1000  | -20 |
| 247 | SCD                               | SCD               | SCD                                          | Santa Cruz        | sc-58420     | 1127 | Mouse  | Valid            | 1:30    | 4   |
| 248 | SDHA                              | SDHA              | SDHA                                         | CST               | 11998        | 1339 | Rabbit | Valid            | 1:250   | -20 |
| 249 | SF2/ASF                           | SF2               | SRSF1                                        | Invitrogen        | 32-4500      | 1131 | Mouse  | Valid            | 1:150   | -20 |
| 250 | Shc (phospho Y317)                | Shc_pY317         | SHC1                                         | CST               | 2431         | 1031 | Rabbit | Valid            | 1:30    | -20 |

|     |                              |                  |                                 |                   |           |      |        |                                     |         |     |
|-----|------------------------------|------------------|---------------------------------|-------------------|-----------|------|--------|-------------------------------------|---------|-----|
| 251 | SHP-2 (phospho Y542)         | SHP-2_pY542      | PTPN11                          | CST               | 3751      | 1180 | Rabbit | Use with Caution                    | 1:75    | -20 |
| 252 | SLC1A5                       | SLC1A5           | SLC1A5                          | Sigma-Aldrich     | HPA035240 | 1313 | Rabbit | Use with Caution                    | 1:15000 | -20 |
| 253 | Sfn11                        | Sfn11            | SLFN11                          | Santa Cruz        | sc-136891 | 1411 | Goat   | Use with Caution                    | 1:250   | 4   |
| 254 | Smac/Diablo                  | Smac             | DIABLO                          | CST               | 2954      | 610  | Mouse  | **Used for QC**                     | 1:150   | -20 |
| 255 | Smad1                        | Smad1            | SMAD1                           | Abcam             | ab33902   | 922  | Rabbit | Valid                               | 1:750   | -20 |
| 256 | Smad3                        | Smad3            | SMAD3                           | Abcam             | ab40854   | 796  | Rabbit | Valid                               | 1:150   | -20 |
| 257 | Smad4                        | Smad4            | SMAD4                           | Santa Cruz        | sc-7966   | 920  | Mouse  | Valid                               | 1:30    | 4   |
| 258 | Snail                        | Snail            | SNAI1                           | CST               | 3895      | 616  | Mouse  | **Used for QC**                     | 1:50    | -20 |
| 259 | SOD1                         | SOD1             | SOD1                            | CST               | 4266      | 1818 | Mouse  | Valid                               | 1:500   | -20 |
| 260 | SOD2                         | SOD2             | SOD2                            | CST               | 13141     | 1328 | Rabbit | Valid                               | 1:2500  | -20 |
| 261 | Sox2                         | Sox2             | SOX2                            | CST               | 2748      | 1670 | Rabbit | Valid                               | 1:200   | -20 |
| 262 | Src                          | Src              | SRC                             | Millipore         | 05-184    | 621  | Mouse  | Valid                               | 1:200   | -20 |
| 263 | Src (phospho Y527)           | Src_pY527        | SRC, YES1, FYN<br>FGR           | CST               | 2105      | 626  | Rabbit | Valid                               | 1:30    | -20 |
| 264 | Src Family (phospho Y416)    | Src_pY416        | SRC, LYN, FYN<br>LCK, YES1, HCK | CST               | 2101      | 623  | Rabbit | Valid                               | 1:500   | -20 |
| 265 | Stat3                        | Stat3            | STAT3                           | CST               | 4904      | 1197 | Rabbit | Use with Caution                    | 1:3000  | -20 |
| 266 | Stat3 (phospho Y705)         | Stat3_pY705      | STAT3                           | CST               | 9131      | 637  | Rabbit | Valid                               | 1:30    | -20 |
| 267 | Stat5a                       | Stat5a           | STAT5A                          | Abcam             | ab32043   | 638  | Rabbit | Valid                               | 1:250   | -20 |
| 268 | Stathmin 1                   | Stathmin-1       | STMN1                           | Abcam             | ab52630   | 718  | Rabbit | Valid                               | 1:75    | -20 |
| 269 | Syk                          | Syk              | SYK                             | Santa Cruz        | sc-1240   | 1033 | Mouse  | Valid                               | 1:3000  | 4   |
| 270 | Tau                          | Tau              | TAU                             | Millipore         | 05-348    | 646  | Mouse  | Use with Caution                    | 1:100   | -20 |
| 271 | TAZ                          | TAZ              | WWTR1                           | CST               | 4883      | 1848 | Rabbit | Valid                               | 1:300   | -20 |
| 272 | TFAM                         | TFAM             | TFAM                            | CST               | 7495      | 1333 | Rabbit | Valid                               | 1:300   | -20 |
| 273 | TIGAR                        | TIGAR            | C12ORF5                         | Abcam             | ab137573  | 1107 | Rabbit | Valid                               | 1:100   | -20 |
| 274 | Transferrin Receptor         | TFRC             | TFRC                            | Novus Biologicals | 22500002  | 1140 | Rabbit | Valid                               | 1:15000 | -20 |
| 275 | Transglutaminase II          | Transglutaminase | TGM2                            | Lab Vision        | MS-224-P1 | 908  | Mouse  | Valid                               | 1:150   | 4   |
| 276 | TRIM25                       | TRIM25           | TRIM25                          | Abcam             | ab167154  | 1756 | Rabbit | Use with Caution                    | 1:2000  | -20 |
| 277 | TSC1/Hamartin                | TSC1             | TSC1                            | CST               | 4906      | 1125 | Rabbit | Use with Caution                    | 1:200   | -20 |
| 278 | TSC2/Tuberin (phospho T1462) | Tuberin_pT1462   | TSC2                            | CST               | 3617      | 671  | Rabbit | Valid                               | 1:30    | -20 |
| 279 | TF1                          | TF1              | NKX2-1                          | Abcam             | ab76013   | 1081 | Rabbit | Valid                               | 1:30    | -20 |
| 280 | Tuberin                      | Tuberin          | TSC2                            | Abcam             | ab32554   | 670  | Rabbit | Valid                               | 1:2500  | -20 |
| 281 | TUFM                         | TUFM             | TUFM                            | Abcam             | ab173300  | 1842 | Rabbit | Valid                               | 1:300   | -20 |
| 282 | Twist                        | TWIST            | TWIST2                          | Santa Cruz        | sc-81417  | 1353 | Mouse  | Use with Caution                    | 1:30    | 4   |
| 283 | Tyro3                        | Tyro3            | TYRO3                           | CST               | 5585      | 1080 | Rabbit | Valid                               | 1:30    | -20 |
| 284 | UBAC1                        | UBAC1            | UBAC1                           | Sigma-Aldrich     | HPA005651 | 1270 | Rabbit | Valid                               | 1:250   | -20 |
| 285 | Ubiquitinyl Histone H2B      | Ubq-Histone-H2B  | H2BFBM                          | Millipore         | 05-1312   | 1604 | Mouse  | Use with Caution                    | 1:500   | 4   |
| 286 | UGT1A                        | UGT1A            | UGT1A1                          | Santa Cruz        | sc-271268 | 1267 | Mouse  | Valid                               | 1:75    | 4   |
| 287 | ULK1 (phospho S757)          | ULK1_pS757       | ULK1                            | CST               | 6888      | 1626 | Rabbit | Use with Caution                    | 1:1000  | -20 |
| 288 | VASP                         | VASP             | VASP                            | CST               | 3112      | 678  | Rabbit | Valid                               | 1:250   | -20 |
| 289 | VDAC1/Porin                  | Porin            | VDAC1                           | Abcam             | ab14734   | 1254 | Mouse  | Valid                               | 1:300   | -20 |
| 290 | VEGF Receptor 2              | VEGFR-2          | KDR                             | CST               | 2479      | 688  | Rabbit | Valid                               | 1:12000 | -20 |
| 291 | VHL/EPPK1**                  | VHL-EPPK1        | EPPK1                           | BD Biosciences    | 556347    | 693  | Mouse  | Under Evaluation<br>(Targets EPPK1) | 1:1000  | 4   |
| 292 | Vimentin                     | Vimentin         | VIM                             | Dako              | M0725     | 1393 | Mouse  | Use with Caution                    | 1:250   | 4   |
| 293 | Wee1                         | Wee1             | WEE1                            | CST               | 4936      | 1802 | Rabbit | Use with Caution                    | 1:2000  | -20 |
| 294 | Wee1 (Phospho S642)          | Wee1_pS642       | WEE1                            | CST               | 4910      | 2058 | Rabbit | Use with Caution                    | 1:75    | -20 |
| 295 | WIPI1                        | WIPI1            | WIPI1                           | CST               | 12124     | 1627 | Rabbit | Use with Caution                    | 1:1000  | -20 |
| 296 | WIPI2                        | WIPI2            | WIPI2                           | CST               | 8567      | 1628 | Rabbit | Use with Caution                    | 1:1000  | -20 |
| 297 | XBP1                         | XBP1             | XBP1                            | Santa Cruz        | sc-32136  | 1044 | Goat   | Use with Caution                    | 1:200   | 4   |
| 298 | XPA                          | XPA              | XPA                             | Santa Cruz        | sc-56813  | 1359 | Mouse  | Valid                               | 1:75    | 4   |
| 299 | XPF                          | XPF              | XPF                             | Abcam             | ab73720   | 2015 | Rabbit | Use with Caution                    | 1:100   | -20 |
| 300 | XRCC1                        | XRCC1            | XRCC1                           | CST               | 2735      | 906  | Rabbit | Use with Caution                    | 1:30    | -20 |
| 301 | YAP                          | YAP              | YAP1                            | Santa Cruz        | sc-15407  | 780  | Rabbit | Under Evaluation                    | 1:200   | 4   |
| 302 | YAP (phospho S127)           | YAP_pS127        | YAP1                            | CST               | 4911      | 782  | Rabbit | Under Evaluation                    | 1:750   | -20 |
| 303 | YB1 (phospho S102)           | YB1_pS102        | YBX1                            | CST               | 2900      | 835  | Rabbit | Valid                               | 1:50    | -20 |
| 304 | ZAP-70                       | ZAP-70           | ZAP70                           | CST               | 2705      | 1828 | Rabbit | Use with Caution                    | 1:1000  | -20 |
