# Supplementary figures and images for: PI3K-driven HER2 expression is a potential therapeutic target in colorectal cancer stem cells
Source: HighWire-hosted journal article supplement (doi:10.1136/gutjnl-2020-323553), 2021-01-12

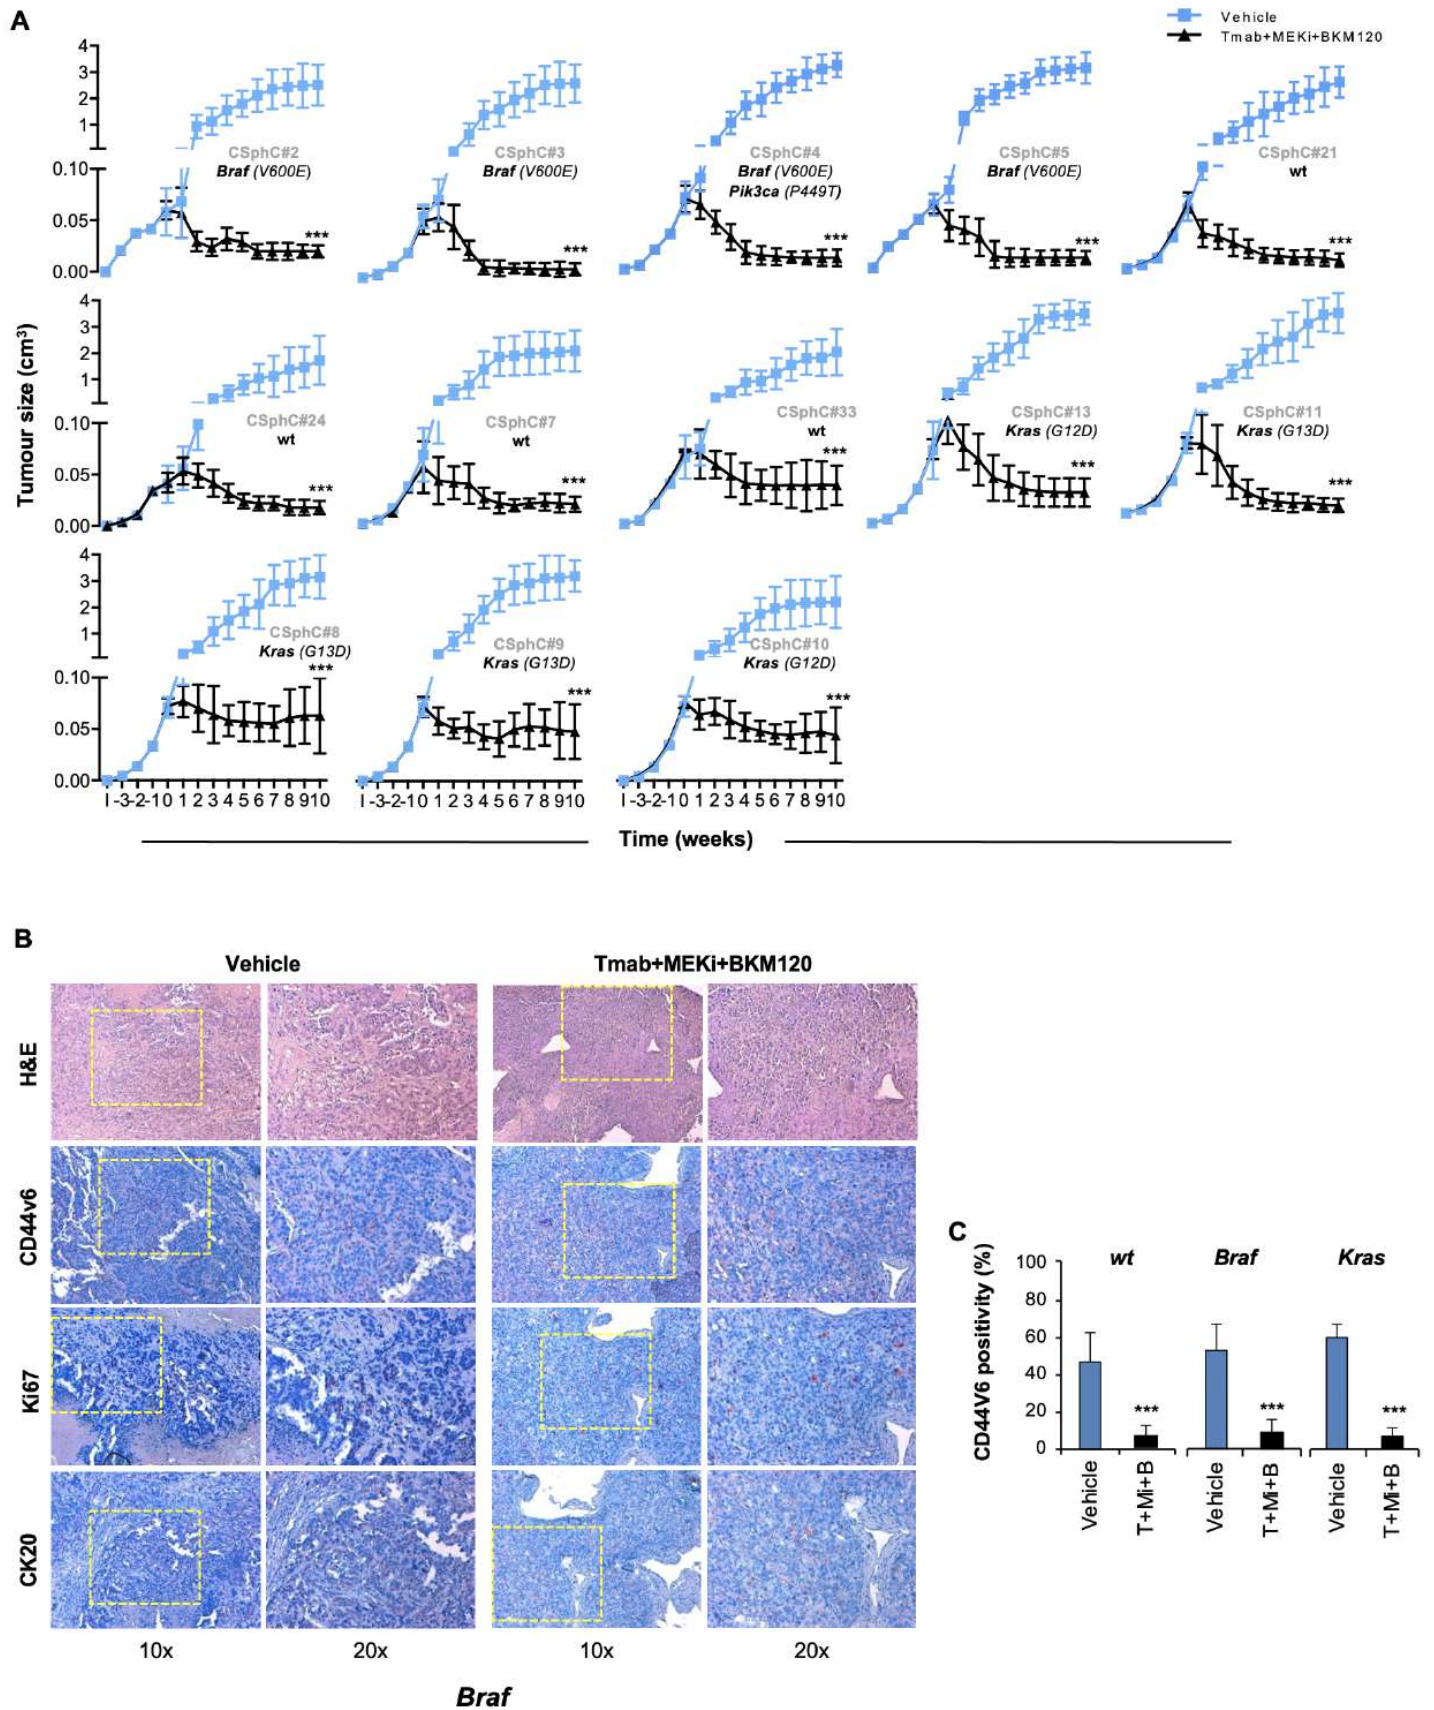

Supplementary Figure 4 Mangiapane et al.

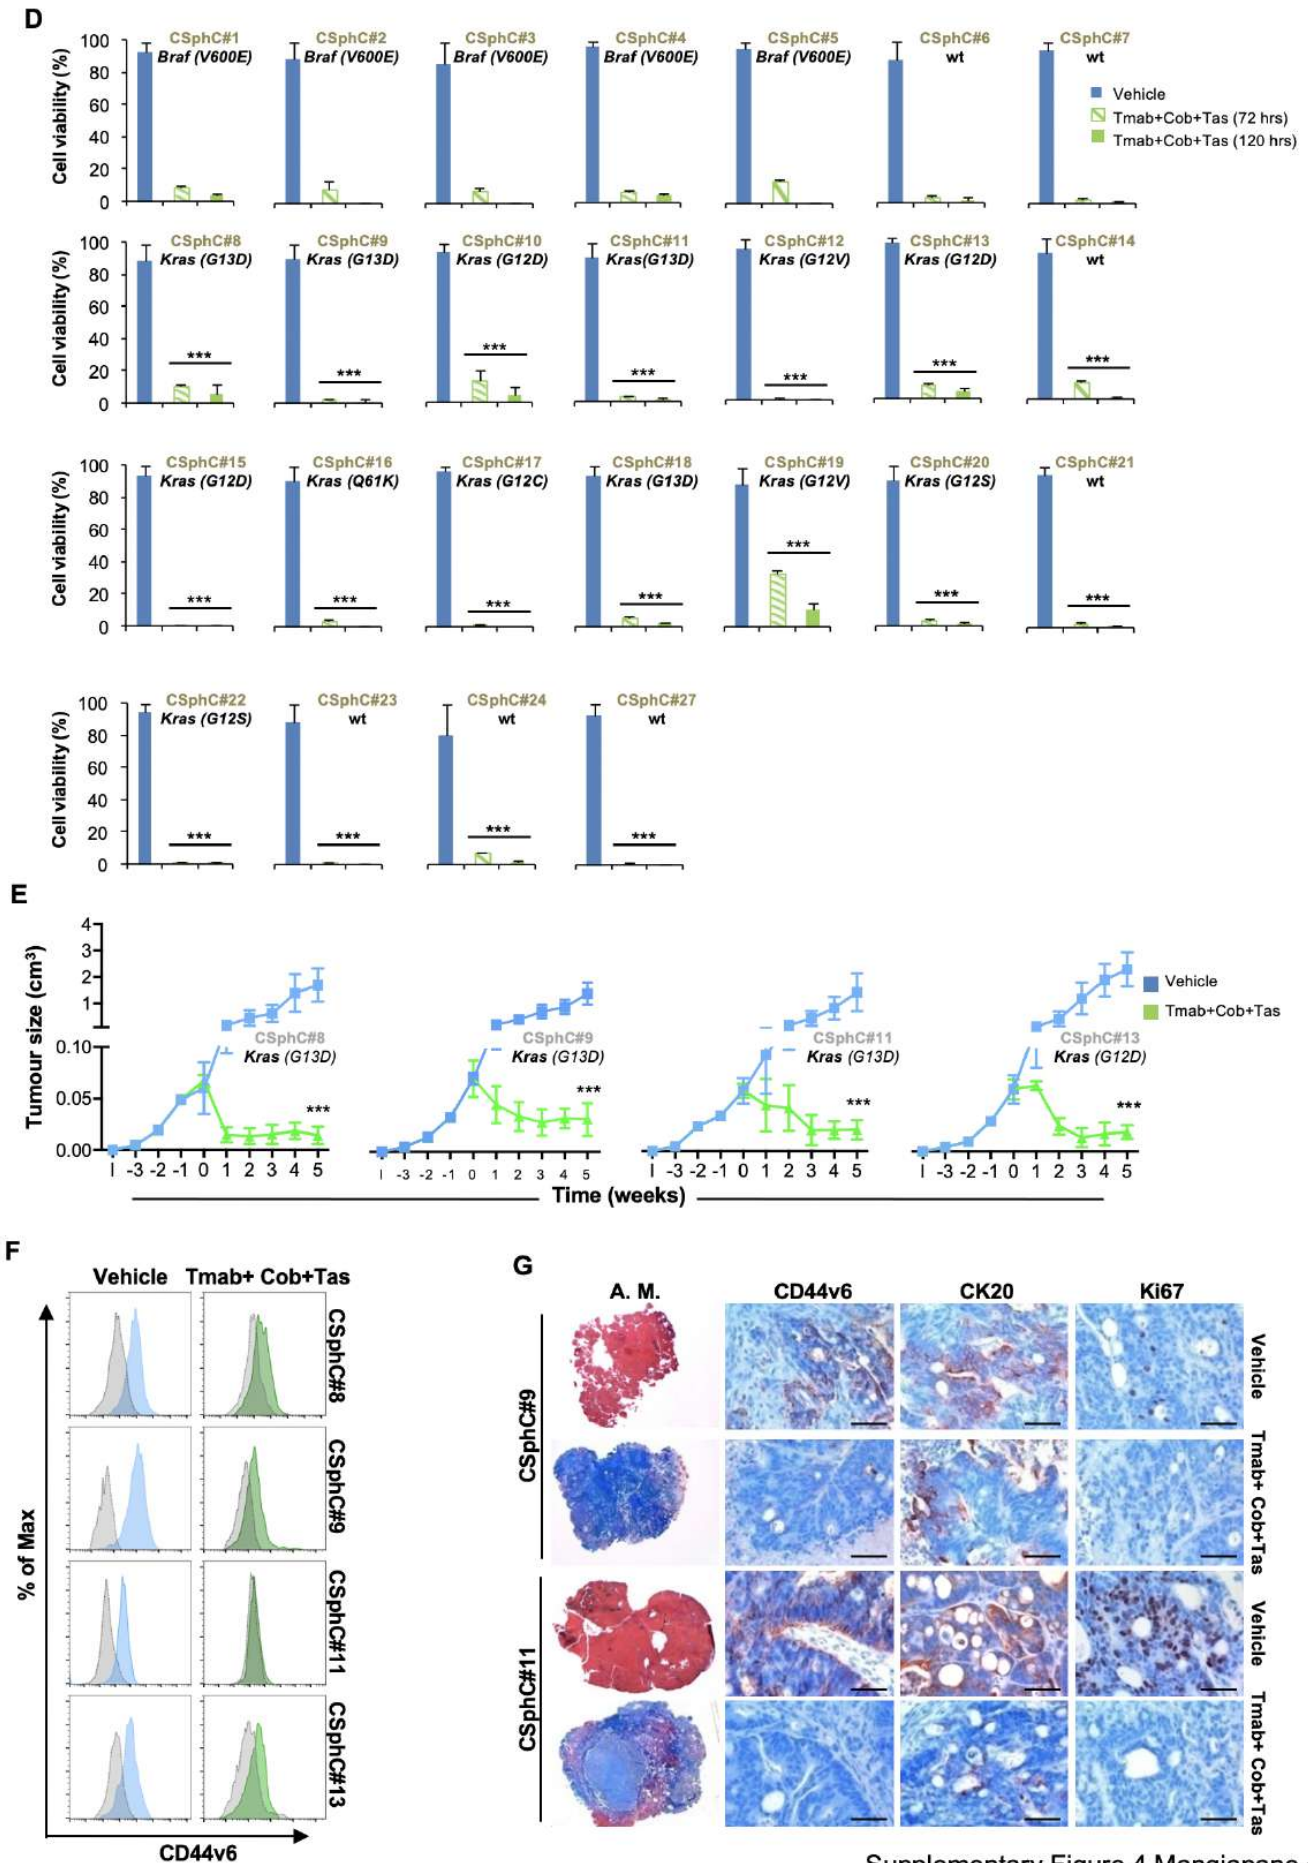

Supplementary Figure 4 Mangiapane et al.

Supplement: gutjnl-2020-323553supp008_data_supplement.pdf [file gutjnl-2020-323553supp008_data_supplement.pdf]
